# Supplementary material for: Diversity in a drop: plant-pollinator interaction, flower and nectar traits shaping nectar mycobiome
Source: Research Square preprint supplement (doi:10.21203/rs.3.rs-7594443/v1), 2025-10-10
Supplement: Supplementary file 1 [file 68f813b8d877f232a6c83cb8.xlsx]

## Sheet: Sup_table3
	species	access	ASP	GLU	ALA	CYS	GLY	SER	THR	TYR	ARG	ASN	GLN	HIS	LYS	PRO	ILE	LEU	MET	PHE	TRP	VAL	ORN	CIT	TAU	AABA	BABA	GABA	Fructose	Glucose	Sucrose	n_samples
0	Angelica_archangelica	open	50.6	19.8	7.27	27.1	9.49	15.8	5.38	16.3	4.16	25.2	12.5	38.9	17.1	22.5	10.8	38.2	0	24.3	29.6	14.2	9.99	0	6.05	10.4	0	6.05	49.5	108	96	2
1	Angelica_archangelica	resticted	269	31.1	8.29	46	10.2	26.1	6.95	61.3	5.06	36	17.4	89.1	31.1	26.8	36.1	68.6	0	78.4	176	23.2	16.6	0	8.82	10.5	0	6.09	363	275	216	1
2	Dianthus_seguieri	open	**49.7**	91	**35.9**	**35.2**	25	28.1	**18**	**23.3**	13.5	22.5	15	**23.6**	**11.1**	13.9	23.6	**23.3**	17.7	22.9	26.7	19.5	13.6	**17.5**	12.1	12.1	**8.22**	9.82	21.6	16.8	66.7	3
3	Dianthus_seguieri	resticted	**36**	67.3	**17.6**	**22.1**	24.3	18.5	**7.65**	**14.3**	12	18.9	19	**12.5**	**6.32**	11	18.5	**16**	15.8	18.2	22.2	14.8	17.4	**9.27**	15.7	8.76	**0**	8.9	31.3	32.9	85.5	2
5	Iris_pseudacorus	open	**81.5**	67.5	**19.9**	35.5	85.1	30.1	**70**	17	6.83	**43.3**	71.4	15.6	19.4	**37.5**	30.9	42.5	2.25	27.2	184	16.5	12.3	37.2	12.9	**6.19**	**7.83**	10.3	**134**	**183**	5.36	2
6	Iris_pseudacorus	resticted	**43.9**	46	**11.9**	33.4	47.7	26.6	**13.9**	21.4	5.4	**78.5**	27	18.9	19.6	**24.2**	30.6	43.3	5.02	28.1	189	18.1	14.7	0	11.6	**13.7**	**5.51**	15.3	**66.6**	**84**	90.6	3
7	Kniphofia_uvaria	open	**57.4**	84.4	133	159	42.2	**265**	21	**55.7**	37.2	463	104	32.4	**127**	90.4	**421**	157	22.2	78.7	394	**121**	45.4	23.4	35.7	37.5	**28.1**	**21.7**	40.9	75.5	1.31	3
8	Kniphofia_uvaria	resticted	**33.1**	129	267	278	181	**102**	52.2	**39.1**	50.8	286	196	24.6	**320**	96.1	**187**	267	32.6	61.7	476	**74.5**	97	29.6	102	45	**16.4**	**15**	52.3	97.8	3.15	2
9	Lilium_martagon	open	68	74.4	22	16.3	26.6	42.3	7.11	**7.77**	11.9	**47.6**	18.8	18.8	21.8	19	**24.7**	23.6	0	15.2	**22.3**	14.2	16.9	0	**8.9**	6.38	0	0	3.81	3.65	2.18	2
10	Lilium_martagon	resticted	81.2	96.8	26.1	20.7	30.6	58.7	7.4	**11.5**	13.3	**93.2**	21.1	21.3	22.7	21.8	**33.1**	27.8	0	15.7	**34.3**	14.8	16.1	0	**13.1**	7.81	0	0	361	529	0	3
11	Lysimachia_clethroides	open	14.6	19	16.2	5.04	17.7	6.21	8.99	14.8	0	8.21	9.48	13.5	9.99	0	20.2	7.82	0	**6.31**	15.3	17.8	8.21	11.4	0	6.67	0	0	40.9	79.1	37.5	2
12	Lysimachia_clethroides	resticted	13.7	14.9	15.1	5.62	13.5	5.63	13	17.9	0	7.59	7.27	12.4	10.3	0	17.9	7.29	0	**4.38**	14.7	15.8	7.84	10.8	0	5	0	0	36.1	45.5	28.2	3
13	Phlomis_russeliana	open	**16.2**	53.9	**51.6**	**26**	**31.4**	**35.1**	0	**17.6**	**15.1**	18.1	14	**11.5**	**22.9**	21.6	35.8	**33.1**	0	39.8	**97.6**	15	15.6	**10.4**	8.37	7.04	**7.72**	**0**	66.7	20	**1.09**	3
14	Phlomis_russeliana	resticted	**28**	72.2	**61.5**	**42.6**	**44.1**	**45.4**	0	**25.2**	**25.5**	31.7	18.1	**17.4**	**31.6**	24.6	44.1	**44.5**	0	44.5	**263**	20	20.4	**17.9**	12.5	10.7	**12.8**	**11.1**	115	61.7	**411**	3
15	Polemonium_caeruleum	open	**13.5**	**47.2**	**22.8**	24.6	49.8	**15.9**	**8.84**	**16.1**	**0**	**27.2**	15.5	13.7	17.5	16	**14**	**25.6**	**0**	**22.2**	**44.8**	17.4	17.5	**0**	**9.06**	**9.89**	11.4	0	127	123	187	3
16	Polemonium_caeruleum	resticted	**25.3**	**169**	**35.9**	32	84.3	**31.2**	**15**	**23.4**	**30.7**	**55.9**	19.3	18.3	23.5	27.4	**25.4**	**47.2**	**13.2**	**42.2**	**87.6**	23.6	28.1	**29**	**11.9**	**16.7**	20.5	0	24.7	18	42.7	3
17	Salvia_hybrida	open	**10.7**	13.2	30.6	25.7	14.4	**5.32**	0	**21.8**	**6.77**	7.51	**8.4**	6.3	**27.3**	16.5	18.5	19.9	0	19.2	35.6	16.3	**16.3**	0	18.7	7.88	0	0	106	146	137	3
18	Salvia_hybrida	resticted	**6.35**	10.8	27.3	23.5	13	**2.07**	0	**18**	**4.25**	5.68	**5.25**	0	**22.8**	13.6	16	18.3	0	17.3	32.9	13.6	**13.4**	0	16.1	5.49	0	0	119	136	72.3	3
