# Supplementary material for: Diversity in a drop: plant-pollinator interaction, flower and nectar traits shaping nectar mycobiome
Source: Research Square preprint supplement (doi:10.21203/rs.3.rs-7594443/v1), 2025-10-10
Supplement: Supplementary file 2 [file 8c275bea2f8d032635190e50.xlsx]

## Sheet: cukry
Species	Nectar accesiblity	Asp	Glu	Asn	Ser	Gln	His	Gly	Arg	Ala	Tau	BABA	AABA	Cys	Val	Met	Trp	Phe	Ile	Leu	Lys	Pro	Fructose	Glucose	Saccharose
Angelica archangelica	open	87.983	167.388	112.736	101.366	141.839	41.487	119.645	16.498	118.387	36.498	17.443	10.443	69.387	41.433	31.774	334.587	79.746	119.398	26.398	89.746	42.398	18.62	17.17	342.69
Iris pseudacorus	open	77.389	148.398	128.844	103.288	139.439	39.54	121.645	17.587	121.487	34.665	18.486	14.398	66.498	40.543	34.667	549.544	83.587	117.488	23.533	55.408	39.498	14.93	12.98	392.89
Polemonium caeruleum	open	156.304	426.325	198.704	168.546	359.679	98.535	162.945	19.118	128.398	38.207	26.54	11.354	67.051	39.476	36.737	734.451	200.99	120.815	28.766	47.587	90.213	2023-06-29	2023-07-28	289.39
Impatiens walleriana	open	64.43	155.664	133.125	102.387	134.487	64.395	116.422	16.927	132.484	24.194	18.67	8.125	64.559	38.553	38.598	529.733	93.803	89.375	19.476	50.487	40.185	18.43	17.54	262.85
Kniphofia uvaria	open	62.873	178.498	141.273	98.399	139.945	62.498	132.598	19.377	118.58	28.547	19.332	10.476	62.586	45.308	39.466	485.344	71.587	80.559	23.688	48.387	35.488	4.39	7.49	289.49
Phlomis russeliana	open	102.408	273.482	167.488	132.388	219.454	79.654	221.487	18.337	119.475	29.488	21.575	11.494	73.559	47.588	41.873	419.497	110.508	79.587	27.433	78.487	48.322	5.49	2023-07-02	301.29
Lysimachia clethroides	open	93.442	183.487	145.732	122.666	132.855	65.766	123.798	20.485	129.845	27.455	18.322	14.39	75.697	44.122	35.709	512.498	178.947	65.785	18.498	87.598	48.398	10.77	9.75	339.98
Salvia hybrida	open	99.783	203.376	156.873	145.988	178.237	61.345	124.656	23.478	126.338	18.448	19.334	12.387	78.386	42.486	34.334	511.498	96.488	69.556	26.546	78.546	45.391	5.51	7.85	429.01
Lilium martagon	open	121.874	198.498	156.732	138.293	155.388	75.65	97.536	19.376	134.587	24.866	13.298	11.387	81.445	45.233	33.568	438.59	111.688	88.699	28.466	100.66	57.38	6.92	5.49	389.42
Dianthus seguieri	open	103.245	189.398	142.002	113.663	143.599	65.436	118.457	13.287	143.955	26.457	14.376	17.287	85.449	46.776	32.549	389.498	101.387	119.488	21.487	89.439	59.443	6.39	2023-08-29	303.48
Angelica archangelica	restricted	76.498	211.398	167.299	143.387	178.434	49.554	121.554	15.439	145.689	21.587	14.385	16.498	87.339	41.558	39.576	338.509	79.488	139.547	19.476	51.532	39.455	3.95	2.75	766.32
Iris pseudacorus	restricted	172.487	468.497	187.854	163.587	295.155	103.294	193.606	17.666	126.75	27.707	13.598	19.434	85.275	46.774	46.474	397.232	209.413	204.056	28.326	140.59	80.649	2.39	2023-01-29	663.29
Polemonium caeruleum	restricted	55.066	161.336	65.787	59.492	100.519	47.656	139.654	18.398	121.49	35.21	11.386	15.487	66.65	44.309	42.95	404.679	136.766	167.521	29.698	49.567	44.507	3.72	2023-01-28	637.65
Impatiens walleriana	restricted	102.253	204.141	157.148	125.325	78.534	47.584	209.553	30.436	65.948	14.706	10.432	43.984	66.534	39.497	16.498	560.303	112.948	143.665	14.883	49.459	43.498	4.32	2.64	579.19
Kniphofia uvaria	restricted	108.347	261.344	278.06	157.791	187.32	48.206	220.296	32.498	62.498	23.851	11.432	49.151	68.655	34.548	18.498	377.423	121.094	132.498	13.288	41.387	41.294	2023-06-13	2.53	400.45
Phlomis russeliana	restricted	73.622	138.202	120.383	84.737	99.577	64.576	140.727	37.498	103.991	18.333	12.544	53.498	69.676	37.484	19.445	390.041	116.498	129.488	13.687	48.554	33.488	3.45	3.82	638.3
Lysimachia clethroides	restricted	224.485	382.354	242.684	187.19	221.544	123.921	309.854	34.884	141.835	39.511	11.434	74.166	67.56	37.544	14.39	541.483	138.96	132.598	17.387	50.443	112.398	2023-03-31	1.83	407.61
Salvia hybrida	restricted	72.984	145.387	138.943	132.983	132.445	46.576	189.376	31.367	147.466	18.498	12.332	68.448	72.435	35.456	16.45	428.498	128.398	139.656	16.485	39.476	38.487	2.49	1.97	345.52
Lilium martagon	restricted	69.498	137.283	129.477	121.665	121.498	44.587	192.477	30.553	128.366	19.54	12.322	69.331	73.665	40.544	17.448	389.494	118.498	129.554	11.481	36.397	34.322	5.92	7.56	303.95
Dianthus seguieri	restricted	89.348	108.736	102.439	74.332	104.398	40.387	179.322	28.477	67.664	25.565	13.534	54.834	76.388	39.545	18.344	390.577	88.682	139.653	11.465	37.466	36.288	2.52	2023-02-21	456.84
