# Supplementary material for: Diversity in a drop: plant-pollinator interaction, flower and nectar traits shaping nectar mycobiome
Source: Research Square preprint supplement (doi:10.21203/rs.3.rs-7594443/v1), 2025-10-10
Supplement: Supplementary file 3 [file 9134da55ae34cb5fbf6a259b.docx]

**Supplementary**

Figure 1. Boxplots displaying the concentration of various amino acids in nectar. Each panel represents a different plant species, with amino acid concentrations shown on the y-axis and amino acid types on the x-axis. The abbreviations for amino acids are as follows: ASP (Aspartic acid), GLU (Glutamic acid), ALA (Alanine), CYS (Cysteine), GLY (Glycine), SER (Serine), THR (Threonine), TYR (Tyrosine), ARG (Arginine), LEU (Leucine), MET (Methionine), PHE (Phenylalanine), TRP (Tryptophan), and VAL (Valine). The central line of each box represents the median value, while the lower and upper edges of the box correspond to the first and third quartiles (interquartile range, IQR). Whiskers extend to the smallest and largest observations within 1.5 times the IQR from the quartiles, while individual points outside this range are considered outliers.

Figure 2. Boxplots displaying the concentration of various sugars in nectar (pmol/μl). Each panel represents a different plant species, with sugars concentrations shown on the y-axis and amino acid types on the x-axis. The central line of each box represents the median value, while the lower and upper edges of the box correspond to the first and third quartiles (interquartile range, IQR). Whiskers extend to the smallest and largest observations within 1.5 times the IQR from the quartiles, while individual points outside this range are considered outliers.

Table 1. List of studied plant species with their floral traits, including flower colour, size, orientation, nectar accessibility, flower lifespan, and primary pollinator groups, with references.

Table 2. Concentrations of nectar components, including amino acid and sugars (fructose, glucose, sucrose; pmol/μl), summarized by plant species and treatment (open vs. restricted flowers). The abbreviations are as follows: ASP (Aspartic acid), GLU (Glutamic acid), ALA (Alanine), CYS (Cysteine), GLY (Glycine), SER (Serine), THR (Threonine), TYR (Tyrosine), ARG (Arginine), LEU (Leucine), MET (Methionine), PHE (Phenylalanine), TRP (Tryptophan), and VAL (Valine).

Table 3. Values of varying amino acid presence in nectar chemistry (amino acid and sugar profiles; ) between open and restricted flowers. Statistically significant differences between treatments are highlighted with asterix as determined by Welch’s *t*-test (*p* < 0.05).

Table 4. Frequency of flower visitor visits per hour, calculated based on observational recordings for each plant species.
