# Supplementary material for: Diversity in a drop: plant-pollinator interaction, flower and nectar traits shaping nectar mycobiome
Source: Research Square preprint supplement (doi:10.21203/rs.3.rs-7594443/v1), 2025-10-10
Supplement: Supplementary file 4 [file db4e93ed193faa416ff2ce24.xlsx]

## Sheet: Sheet1
Species	Flower colour	Flower size	Flower angle on stem / inflorescence	Nectar accessibility	Flower lifespan	Pollinators	Source
Angelica archangelica	Greenish-white to pale yellow	Inflorescence, umbels ~25 cm diameter, tiny flowers	Flat-topped umbels, <90° from stem	Easily accessible; nectar-rich	Blooms once in 2nd year; umbels last weeks	Honey bees, bumblebees, butterflies	Ostrowiecka D, et al. (2021) Front Plant Sci 12:755830. https://doi.org/10.3389/fpls.2021.755830
Iris pseudacorus	Bright yellow	Flowers 70–90 mm across	Upright	High nectar per flower	Each flower blooms several days	Bumblebees, honey bees, flies	CABI. (2019) Invasive Species Compendium: Iris pseudacorus. https://www.cabi.org/isc/datasheet/29156
Polemonium caeruleum	Blue to pale violet	Corolla ~15–25 mm across	~90°	Basal tube; protected by staminal hairs	Protandrous; female phase ~2–3 days	Bees, flies, beetles, butterflies	Ostrowiecka D, et al. (2021) Front Plant Sci 12:755830. https://doi.org/10.3389/fpls.2021.755830
Impatiens walleriana	Bright pink, red, white	Corolla 20–30 mm; spur ~15–25 mm	~90°/nodding	Hidden deep in spur	4–5 days per flower	Bumble bees, hawkmoths	Bartoš M, et al. (2012) Biologia 67(6):1103–1110. https://doi.org/10.2478/s11756-012-0102-7
Kniphofia uvaria	Red to orange, yellow tipped	Inflorescence 15–20 cm; florets ~25 mm	Nodding	Base of tubular florets	Several days per floret in long spike	Sunbirds, butterflies, bees	Johnson SD, et al. (2006) Ann Bot 97(1):147–155. https://doi.org/10.1093/aob/mcj022
Phlomis russeliana	Soft yellow	Corolla tube ≈20–30 mm	~90°	Easily accessible	Several weeks in late spring	Bees, butterflies	Claßen-Bockhoff R, et al. (2004) Ann Bot 94(3):463–480. https://doi.org/10.1093/aob/mch163
Lysimachia clethroides	Pure white	~12 mm per flower	~90°	Accessible nectar and pollen	Flowers for 1–2 weeks	Generalist insects, Macropis bees	Köhler A, et al. (2012) J Poll Ecol 8(3):14–21. https://doi.org/10.26786/1920-7603(2012)8
Salvia hybrida	Varies (red, purple, blue)	Corolla tube ~25–40 mm	~90°/nodding	Restricted; adapted to pollinator type	Spike 4–6 weeks; individual 3–5 days	Bees, hummingbirds	Claßen-Bockhoff R, et al. (2004) Ann Bot 94(3):463–480. https://doi.org/10.1093/aob/mch163
Lilium martagon	Pink	Flower ~60–80 mm across	Nodding	Nectar in basal bulb of tepals	5–7 days per flower	Bees, insects	Zhang J, et al. (2022) Front Plant Sci 13:888167. https://doi.org/10.3389/fpls.2022.888167
Dianthus seguieri	Pink to rose-red	Diameter ~25–35 mm	Upright	Restricted; adapted to pollinator type	1 week per flower	Bees, butterflies	Dafni A, et al. (2005) Plant Syst Evol 255(3-4):169–185. https://doi.org/10.1007/s00606-005-0341-1
