# Supplementary material for: Diversity in a drop: plant-pollinator interaction, flower and nectar traits shaping nectar mycobiome
Source: Research Square preprint supplement (doi:10.21203/rs.3.rs-7594443/v1), 2025-10-10
Supplement: Supplementary file 5 [file f06358f3f47e49edbe0d89bc.xlsx]

## Sheet: Sup_Table 4
plant	solitary_bee_count	Apis_mellifera _count	Musca_count	Coleoptera_count	Formica_count	Bombus_count	Syrphidae_count	Lepidoptera_count	Hymenoptera_count
Angelica	archangelica	0.346136329133141	0.08501594048884165	0.0	0.01518141794443601	0.0	0.0	0.0	0.0	0.006072567177774404
Dianthus	seguieri	0.20282728948985862	0.0	0.0	0.0	0.0	0.0	0.0	0.0	0.0
Impatiens	walleriana	0.0	0.0	0.02123893805309735	0.0	0.0424778761061947	0.0	0.0	0.0	0.0
Iris	pseudacorus	0.013332592633742571	0.23998666740736627	0.0	0.0	0.003333148158435643	0.1799900005555247	0.0	0.0	0.0
Kniphofia	uvaria	0.7202816138640671	0.0	0.0	0.0	0.0	0.0	0.0	0.0	0.07581911724884917
Lilium	martagon	0.5711656265278536	0.0	0.0017255759109602831	0.0	0.006902303643841133	0.0	0.0017255759109602831	0.0017255759109602831	0.0034511518219205663
Lysimachia	clethroides	0.035656803268540295	0.002971400272378358	0.01634270149808097	0.005942800544756716	0.0	0.007428500680945895	0.011885601089513432	0.011885601089513432	0.0
Phlomis	russeliana	0.010504201680672268	0.0	0.0	0.0	0.0350140056022409	0.01750700280112045	0.028011204481792715	0.0	0.05952380952380952
Polemonium	caeruleum	0.5546001719690455	0.0	0.0	0.0	0.0032244196044711954	0.006448839208942391	0.009673258813413585	0.0	0.006448839208942391
Salvia	hybrida	0.070085270412335	0.07709379745356851	0.0	0.0	0.0	0.0	0.0	0.0	0.0
